# Supplementary material for: Prevalence, Predictors and Clinical Outcome of Residual Pulmonary Hypertension Following Tricuspid Annuloplasty
Source: PubMed Central journal article supplement — J Am Heart Assoc. 2016 Jul 22;5(7):e003353. doi: 10.1161/JAHA.116.003353 (PMC5015373; doi:10.1161/jaha.116.003353), 2016-07-22
Supplement: JAH3-5-e003353-s001.pdf [file JAH3-5-e003353-s001.pdf]

**Table S1:** Pre and postoperative echocardiographic characteristics of patients who underwent TA

| Variable                                 | All patients (n=137) |           |           | No residual PHT(n=78) |           |          | Mild residual PHT (n=43) |           |          | Significant residual PHT (n=16) |           |          |       |
|------------------------------------------|----------------------|-----------|-----------|-----------------------|-----------|----------|--------------------------|-----------|----------|---------------------------------|-----------|----------|-------|
|                                          | Pre-TA               | Post-TA   | <i>P</i>  | Pre-TA                | Post-TA   | <i>P</i> | Pre-TA                   | Post-TA   | <i>P</i> | Pre-TA                          | Post-TA   | <i>P</i> |       |
| <b>LV parameters</b>                     |                      |           |           |                       |           |          |                          |           |          |                                 |           |          |       |
| LV end-diastolic volume (ml)             | 106.9±47.3           | 86.6±27.3 | <0.01     | 111.9±52.2            | 86.6±27.3 | <0.01    | 99.8±41.3                | 78.2±27.1 | <0.01    | 101.2±34.9                      | 92.8±50.0 | 0.28     |       |
| LV end-systolic volume (ml)              | 50.6±27.1            | 36.8±22.4 | <0.01     | 53.8±29.9             | 36.9±19.2 | <0.01    | 45.8±22.7                | 34.7±18.3 | <0.01    | 47.8±21.6                       | 41.8±40.3 | 0.40     |       |
| LV ejection fraction (%)                 | 52.8±11.8            | 58.4±9.5  | <0.01     | 51.4±13.0             | 59.2±8.8  | <0.01    | 54.9±9.8                 | 57.1±10.5 | 0.13     | 53.4±10.2                       | 57.2±11.0 | 0.32     |       |
| <b>RV parameters</b>                     |                      |           |           |                       |           |          |                          |           |          |                                 |           |          |       |
| RV basal diameter (cm)                   | 4.1±0.9              | 3.6±0.6   | <0.01     | 3.9±0.9               | 3.5±0.6   | <0.01    | 4.2±0.9                  | 3.6±0.6   | <0.01    | 4.5±0.9                         | 4.0±0.6   | 0.04     |       |
| RV mid-cavity diameter (cm)              | 3.2±0.8              | 2.7±0.5   | <0.01     | 3.0±0.8               | 2.7±0.5   | <0.01    | 3.4±0.8                  | 2.7±0.5   | <0.01    | 3.7±0.7                         | 3.0±0.6   | <0.01    |       |
| RV longitudinal diameter (cm)            | 5.9±1.0              | 5.7±0.9   | <0.01     | 5.8±1.1               | 5.6±0.9   | <0.01    | 6.1±1.0                  | 5.8±0.9   | 0.04     | 6.0±1.0                         | 5.7±0.7   | 0.30     |       |
| RV spherical index                       | 4.7±1.1              | 4.3±0.9   | <0.01     | 4.6±1.1               | 4.3±0.9   | 0.08     | 4.9±1.2                  | 4.2±1.0   | <0.01    | 4.9±0.9                         | 4.3±0.7   | 0.06     |       |
| RV end-diastolic area (cm <sup>2</sup> ) | 17.8±6.1             | 14.1±3.9  | <0.01     | 17.2±6.5              | 13.5±3.6  | <0.01    | 18.3±5.3                 | 14.2±3.7  | <0.01    | 19.9±6.1                        | 16.3±5.2  | 0.05     |       |
| RV end-systolic area (cm <sup>2</sup> )  | 11.1±4.3             | 7.8±2.6   | <0.01     | 10.9±4.6              | 7.3±2.5   | <0.01    | 10.9±3.9                 | 7.4±2.2   | <0.01    | 12.3±3.7                        | 9.2±3.4   | <0.01    |       |
| RV fractional area change (%)            | 37.8±12.3            | 46.3±8.1  | <0.01     | 36.4±12.1             | 46.0±8.3  | <0.01    | 40.5±12.8                | 48.0±7.3  | <0.01    | 37.5±11.0                       | 43.6±8.1  | 0.13     |       |
| <b>TV deformations</b>                   |                      |           |           |                       |           |          |                          |           |          |                                 |           |          |       |
| TV annulus diameter (cm)                 | 3.6±0.7              | 2.7±0.5   | <0.01     | 3.4±0.7               | 2.7±0.5   | <0.01    | 3.7±0.6                  | 2.8±0.5   | <0.01    | 4.2±0.7                         | 3.0±0.6   | <0.01    |       |
| TV tethering area (cm <sup>2</sup> )     | 1.1±0.5              | 0.7±0.3   | <0.01     | 1.0±0.5               | 0.7±0.2   | <0.01    | 1.2±0.5                  | 0.8±0.3   | <0.01    | 1.4±0.4                         | 0.9±0.4   | <0.01    |       |
| PASP (mmHg)                              | 49.1±13.3            | 32.3±14.9 | <0.01     | 49.5±14.8             | 22.4±10.2 | <0.01    | 46.9±11.8                | 40.8±4.4  | <0.01    | 53.1±7.8                        | 57.6±5.3  | 0.06     |       |
| TR degree, n (%)                         |                      |           |           |                       |           |          |                          |           |          |                                 |           |          |       |
|                                          | Mild-moderate TR     | 86(62.8)  | 136(99.3) | <0.01                 | 61(78.2)  | 78(100)  | <0.01                    | 18(41.9)  | 43(100)  | <0.01                           | 7(43.8)   | 15(93.8) | <0.01 |
|                                          | Severe TR            | 51(37.2)  | 1(0.7)    |                       | 17(21.8)  | 0(0)     |                          | 25(58.1)  | 0(0)     |                                 | 9(56.2)   | 1(6.2)   |       |

Values are the mean ± SD or n (%).

Abbreviations: LV=left ventricular; PASP = pulmonary artery systolic pressure; PHT = pulmonary hypertension; RV=right ventricular; TV= tricuspid valve; TA = tricuspid annuloplasty; TR = tricuspid regurgitation.
